# Supplementary material
Source: PubMed Central journal article supplement (PMC9373290)
Supplement: 12888_2022_4192_MOESM1_ESM.pdf [file 12888_2022_4192_MOESM1_ESM.pdf]

## Appendix 1 Participant flow

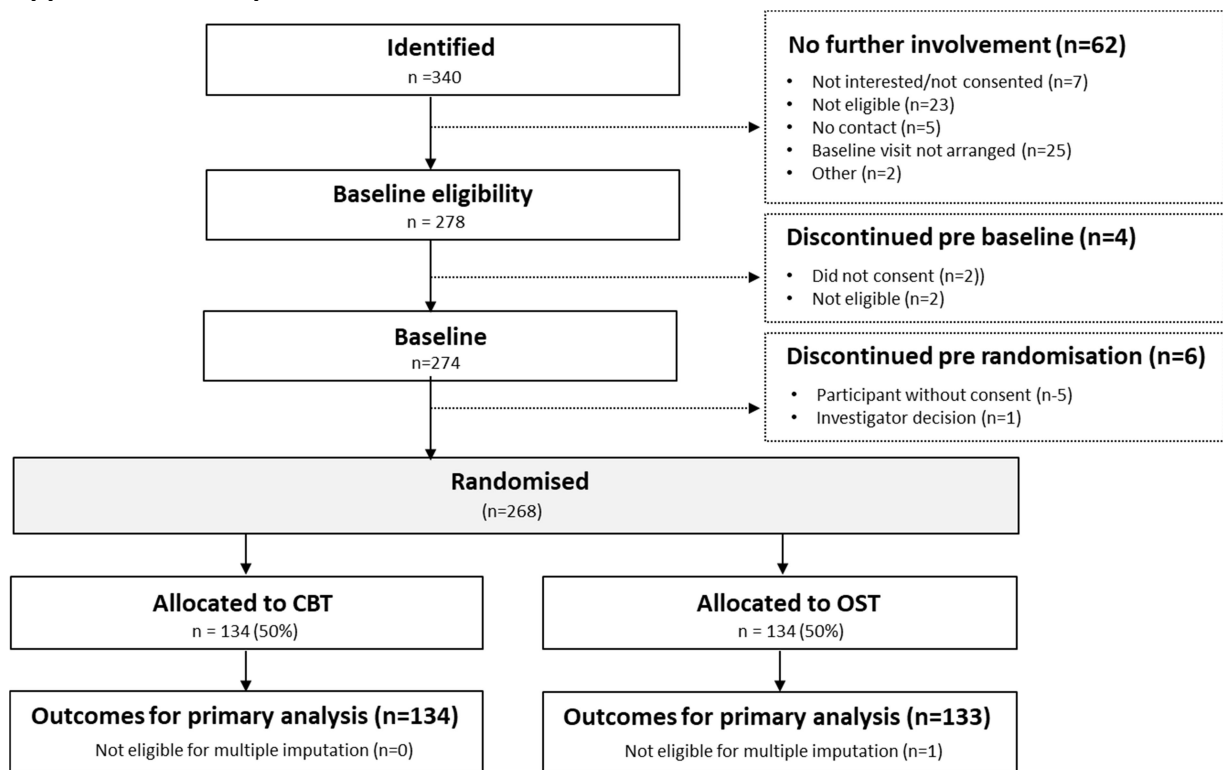

Appendix 2 missing pattern

|                                               | Baseline         |                  |                  | 6-month follow-up |                  |                  | Baseline + 6-month follow-up |                  |                  |
|-----------------------------------------------|------------------|------------------|------------------|-------------------|------------------|------------------|------------------------------|------------------|------------------|
|                                               | Total            | OST              | CBT              | Total             | OST              | CBT              | Total                        | OST              | CBT              |
|                                               | (n=267)<br>n (%) | (n=133)<br>n (%) | (n=134)<br>n (%) | (n=267)<br>n (%)  | (n=133)<br>n (%) | (n=134)<br>n (%) | (n=267)<br>n (%)             | (n=133)<br>n (%) | (n=134)<br>n (%) |
| <b>EQ-5D-Y and resource use questionnaire</b> |                  |                  |                  |                   |                  |                  |                              |                  |                  |
| Completed both                                | 266 (99.6)       | 132 (99.2)       | 134 (100.0)      | 191 (71.5)        | 95 (71.4)        | 96 (71.6)        | 190 (71.2)                   | 94 (70.7)        | 96 (71.6)        |
| Resource use only                             | 1 (0.4)          | 1 (0.8)          | -                | 2 (0.7)           | 1 (0.8)          | 1 (0.8)          |                              |                  |                  |
| EQ-5D-Y only                                  | -                | -                | -                | 2 (0.7)           | 2 (1.5)          | -                |                              |                  |                  |
| Completed none of both                        | -                | -                | -                | 72 (27.0)         | 35 (26.3)        | 37 (27.6)        |                              |                  |                  |
| <b>EQ-5D-Y</b>                                |                  |                  |                  |                   |                  |                  |                              |                  |                  |
| No missing                                    | 267 (100.0)      | 133 (100.0)      | 134 (100.0)      | 193 (72.3)        | 97 (72.9)        | 96 (71.6)        | 193 (72.3)                   | 97 (72.9)        | 96 (71.6)        |
| <b>Resource use questionnaire</b>             |                  |                  |                  |                   |                  |                  |                              |                  |                  |
| No missing                                    | 266 (99.6)       | 132 (99.2)       | 134 (100.0)      | 193 (72.3)        | 96 (72.2)        | 97 (72.4)        | 192 (71.9)                   | 95 (71.4)        | 97 (72.4)        |

### Appendix 3 Intervention costs by trial arm

|                              | OST            |                              | CBT            |                              |
|------------------------------|----------------|------------------------------|----------------|------------------------------|
|                              | Total cost (£) | Cost per session per CYP (£) | Total cost (£) | Cost per session per CYP (£) |
| Training costs               |                |                              |                |                              |
| Train the trainers           |                |                              |                |                              |
| Venue                        | £140.00        | £1.47                        | -              | -                            |
| Refreshment                  | £335.00        | £1.45                        | -              | -                            |
| Consumable costs             | £0.00          | £0.00                        | -              | -                            |
| Trainer's travel costs       | £6,117.00      | £26.48                       | -              | -                            |
| Trainer fee                  | £1,940.00      | £8.40                        | -              | -                            |
| Total                        | £8,392.00      | £36.33                       | -              | -                            |
| Therapist training           |                |                              |                |                              |
| Venue                        | £160.00        | £0.69                        | -              | -                            |
| Refreshment costs            | £732.40        | £3.17                        | -              | -                            |
| Consumable costs             | £264.00        | £1.14                        | -              | -                            |
| Trainer's travel costs       | £317.20        | £1.37                        | -              | -                            |
| Trainer fee                  | £4,500.00      | £19.48                       | -              | -                            |
| Total                        | £5,973.60      | £25.86                       | -              | -                            |
| Intervention delivery costs  |                |                              |                |                              |
| Intervention (staff time)    |                |                              |                |                              |
| Therapy session              | £19,054.33     | £82.49                       | £29,908.85     | £45.45                       |
| Administration / preparation | £5,151.17      | £22.30                       | £5,507.37      | £8.40                        |
| Additional resource          |                |                              |                |                              |
| Second therapist             | £2,037.00      | £8.82                        | £550.67        | £0.84                        |
| Assistant / nurse            | £331.88        | £1.44                        | £55.13         | £0.09                        |
| Stimuli                      | £503.84        | £2.18                        | £811.36        | £1.23                        |
| Supervision*                 | £1,119.77      | £4.84                        | £1,717.01      | £2.61                        |
| Total                        | £28,197.98     | £122.07                      | £38,553.38     | £58.59                       |

\*The calculation method and unit cost were based on Wiles et al. study: Wiles N, Thomas L, Abel A et al. Clinical effectiveness and cost-effectiveness of cognitive behavioural therapy as an adjunct to pharmacotherapy for treatment-resistant depression in primary care: the CoBaIT randomised controlled trial. Health Technol Assess. 2014 May;18(31):1-167.

## Appendix 4 Average service use by trial arm (complete case, n=139)

|                          |             | Baseline                      |                               | 6 months                     |                               |
|--------------------------|-------------|-------------------------------|-------------------------------|------------------------------|-------------------------------|
|                          |             | OST, N=94                     | CBT, N=96                     | OST, N=94                    | CBT, N=96                     |
|                          |             | Mean                          | Mean                          | Mean                         | Mean                          |
|                          |             | (min-max)                     | (min-max)                     | (min-max)                    | (min-max)                     |
| Unit                     |             | (95% CI)                      | (95% CI)                      | (95% CI)                     | (95% CI)                      |
| NHS and PSS              |             |                               |                               |                              |                               |
| Community-based services |             |                               |                               |                              |                               |
| CAMHS related            |             |                               |                               |                              |                               |
| Child psychiatrist       | Appointment | 0.17 (0-2)<br>(0.07 – 0.27)   | 0.12 (0-3)<br>(0.22 – 0.21)   | 0.15 (0-3)<br>(0.04 – 0.26)  | 0.18 (0-5)<br>(0.16 – 0.34)   |
| Child psychotherapist    | Appointment | 0.24 (0-8)<br>(0.01 – 0.47)   | 0.20 (0-18)<br>(-0.18 – 0.56) | 0.07 (0-3)<br>(-0.01 – 0.16) | 0.34 (0-25)<br>(-0.04 – 0.23) |
| Child psychologist       | Appointment | 0.06 (0-3)<br>(-0.01 – 0.14)  | 0.35 (0-11)<br>(0.07 – 0.64)  | 0.30 (0-8)<br>(0.07 – 0.52)  | 0.30 (0-8)<br>(0.04 – 0.57)   |
| Mental health nurse      | Appointment | 1.91 (0-24)<br>(1.17 – 0.65)  | 1.03 (0-9)<br>(0.65 – 1.41)   | 1.97 (0-27)<br>(0.97 – 2.99) | 3.09 (0-24)<br>(2.12 – 4.07)  |
| Family therapist         | Appointment | -                             | 0.01 (0-1)<br>(-0.01 – 0.03)  | 0.02 (0-2)<br>(-0.02 – 0.06) | -                             |
| Non-CAMHS related        |             |                               |                               |                              |                               |
| GP                       | Appointment | 1.65 (0-20)<br>(1.12 – 2.17)  | 1.17 (0-10)<br>(0.86 – 1.48)  | 0.55 (0-10)<br>(0.29 – 0.81) | 0.73 (0-8)<br>(0.43 – 1.04)   |
| Nurse                    | Appointment | 0.40 (0-11)<br>(0.14 – 0.67)  | 0.44 (0-12)<br>(0.13 – 0.74)  | 0.17 (0-3)<br>(0.06 – 0.28)  | 0.39 (0-12)<br>(0.05 – 0.72)  |
| Community paediatrician  | Appointment | 0.18 (0-4)<br>(0.05 – 0.32)   | 0.08 (0-2)<br>(0.01 – 0.15)   | 0.04 (0-2)<br>(-0.01 – 0.09) | 0.03 (0-2)<br>(-0.01 – 0.08)  |
| Child development centre | Visit       | 0.17 (0-12)<br>(-0.09 – 0.42) | 0.01 (0-1)<br>(-0.01 – 0.03)  | 0.08 (0-3)<br>(-0.00 – 0.17) | 0.01 (0-1)<br>(-0.01 – 0.03)  |
| Helpline / NHS-direct    | Call        | 0.05 (0-2)<br>(-0.00 – 0.12)  | 0.05 (0-1)<br>(0.01 – 0.10)   | 0.06 (0-3)<br>(-0.01 – 0.14) | 0.04 (0-2)<br>(-0.01 – 0.09)  |
| Walk-in centre           | Visit       | 0.13 (0-2)<br>(0.04 – 0.22)   | 0.11 (0-2)<br>(0.04 – 0.19)   | 0.10 (0-3)<br>(0.01 – 0.18)  | 0.10 (0-3)<br>(0.02 – 0.18)   |
| Social worker            | Visit       | 0.20 (0-8)<br>(0.00 – 0.40)   | 0.25 (0-7)<br>(0.05 – 0.45)   | 0.07 (0-3)<br>(-0.02 – 0.17) | 0.04 (0-4)<br>(-0.04 – 0.12)  |
| Hospital-based services  |             |                               |                               |                              |                               |
| Emergency services       | Visit       | 0.17 (0-2)<br>(0.08 – 0.26)   | 0.09 (0-2)<br>(0.03 – 0.16)   | 0.12 (0-2)<br>(0.04 – 0.20)  | 0.07 (0-2)<br>(0.01 – 0.14)   |
| Inpatient admission      | Admission   | 0.04 (0-2)<br>(-0.01 – 0.09)  | 0.03 (0-2)<br>(-0.01 – 0.08)  | 0.02 (0-1)<br>(-0.01 – 0.05) | 0.04 (0-2)<br>(-0.02 – 0.10)  |
| Outpatient visit         | Attendance  | 0.24 (0-5)                    | 0.26 (0-8)                    | 0.23 (0-3)                   | 0.28 (0-4)                    |

|                                 |             |                |                |                |                |
|---------------------------------|-------------|----------------|----------------|----------------|----------------|
|                                 |             | (0.07 – 0.42)  | (0.07 – 0.45)  | (0.11 -0.36)   | (0.13 – 0.44)  |
| <b>Medication</b>               |             |                |                |                |                |
| Mental health related           | Type        | 0.22 (0-3)     | 0.18 (0-4)     | 0.22 (0-3)     | 0.18 (0-4)     |
|                                 |             | (0.11 – 0.34)  | (0.05 – 0.31)  | (0.11 – 0.34)  | (0.05 – 0.31)  |
| Non-mental health related       | Type        | 0.48 (0-7)     | 0.38 (0-8)     | 0.48 (0-7)     | 0.38 (0-8)     |
|                                 |             | (0.25 – 0.71)  | (0.17 – 0.58)  | (0.25 – 0.71)  | (0.17 – 0.58)  |
| <b>Education system related</b> |             |                |                |                |                |
| Education psychologist          | Appointment | 0.13 (0-7)     | 0.04 (0-1)     | 0.07 (0-7)     | 0.07 (0-5)     |
|                                 |             | (-0.03 – 0.28) | (0.00 – 0.08)  | (-0.05 – 0.20) | (-0.03 – 0.18) |
| Education welfare officer       | Appointment | 0.06 (0-3)     | 0.32 (0-20)    | 0.17 (0-10)    | 0.05 (0-2)     |
|                                 |             | (-0.01 – 0.14) | (-0.11 – 0.76) | (-0.02 – 0.36) | (-0.01 – 0.11) |
| School nurse                    | Appointment | 0.20 (0-5)     | 0.67 (0-20)    | 0.13 (0-11)    | 0.01 (0-1)     |
|                                 |             | (0.03 – 0.38)  | (0.08 – 1.26)  | (-0.00 – 0.26) | (-0.01 – 0.03) |
| School counsellor               | Appointment | 1.84 (0-30)    | 0.60 (0-10)    | 1.04 (0-25)    | 0.60 (0-20)    |
|                                 |             | (0.80 – 2.88)  | (0.20 – 1.00)  | (0.20 – 1.88)  | (0.04 – 1.17)  |
| <b>Private expense</b>          |             |                |                |                |                |
| Self-paid treatment             | Session     | 0.44 (0-24)    | 0.19 (0-10)    | 0.04 (0-2)     | 0.02 (0-2)     |
|                                 |             | (-0.10 – 0.97) | (-0.08 – 0.45) | (-0.02 – 0.10) | (-0.02 – 0.06) |
| Travel for intervention         | Hour        | -              | -              | 1.85 (0-7)     | 5.31 (0-16)    |
|                                 |             |                |                | (1.64 – 2.06)  | (4.57 – 6.04)  |
| <b>Productivity</b>             |             |                |                |                |                |
| Parental productivity           | Day         | 2.73 (0-63)    | 1.15 (0-19)    | 0.89 (0-10)    | 0.82 (0-12)    |
|                                 |             | (1.10 – 4.36)  | (0.56 – 1.74)  | (0.48 – 1.30)  | (0.43 – 1.22)  |
| Productivity for intervention   | Hour        | -              | -              | 5.32 (0-16)    | 11.01 (0-33)   |
|                                 |             |                |                | (4.79 – 5.85)  | (9.55 – 12.47) |

### Appendix 5 EQ-5D-Y responses by trial arms by data collection time points

|                    | Baseline         |                  |                  | 6 months         |                  |                  |
|--------------------|------------------|------------------|------------------|------------------|------------------|------------------|
|                    | Level 1<br>n (%) | Level 2<br>n (%) | Level 3<br>n (%) | Level 1<br>n (%) | Level 2<br>n (%) | Level 3<br>n (%) |
| <b>OST (n=97)</b>  |                  |                  |                  |                  |                  |                  |
| Mobility           | 87 (89.7)        | 9 (9.3)          | 1 (1.0)          | 89 (91.8)        | 7 (7.2)          | 1 (1.0)          |
| Self-care          | 86 (88.7)        | 7 (7.2)          | 4 (4.1)          | 87 (89.7)        | 10 (10.3)        | -                |
| Usual activity     | 63 (64.9)        | 31 (32.0)        | 3 (3.1)          | 79 (81.4)        | 16 (16.5)        | 2 (2.1)          |
| Pain/discomfort    | 61 (62.9)        | 36 (37.1)        | -                | 70 (72.2)        | 24 (24.7)        | 3 (3.1)          |
| Anxiety/depression | 44 (45.4)        | 43 (44.3)        | 10 (10.3)        | 55 (56.7)        | 36 (37.1)        | 6 (6.2)          |
|                    |                  |                  |                  |                  |                  |                  |
|                    | Baseline         |                  |                  | 6 months         |                  |                  |
|                    | Level 1<br>n (%) | Level 2<br>n (%) | Level 3<br>n (%) | Level 1<br>n (%) | Level 2<br>n (%) | Level 3<br>n (%) |
| <b>CBT (n=96)</b>  |                  |                  |                  |                  |                  |                  |
| Mobility           | 82 (85.5)        | 13 (13.5)        | 1 (1.0)          | 86 (89.6)        | 10 (10.4)        | -                |
| Self-care          | 85 (88.5)        | 11 (11.5)        | -                | 86 (89.6)        | 10 (10.4)        | -                |
| Usual activity     | 65 (67.7)        | 27 (28.1)        | 4 (4.2)          | 76 (79.2)        | 19 (19.8)        | 1 (1.0)          |
| Pain/discomfort    | 61 (63.5)        | 30 (31.3)        | 5 (5.2)          | 69 (71.9)        | 25 (26.0)        | 2 (2.1)          |
| Anxiety/depression | 43 (44.8)        | 47 (49.0)        | 6 (6.2)          | 49 (51.0)        | 40 (41.7)        | 7 (7.3)          |

Note: Level 1: none, Level 2: some, Level 3: extreme

## Appendix 6 CHU-9D responses by trial arms by data collection time points

| OST (n=45)              | Baseline  |           |           |          |          | 6 months  |           |           |          |          |
|-------------------------|-----------|-----------|-----------|----------|----------|-----------|-----------|-----------|----------|----------|
|                         | Level 1   | Level 2   | Level 3   | Level 4  | Level 5  | Level 1   | Level 2   | Level 3   | Level 4  | Level 5  |
| Worried                 | 20 (44.4) | 16 (35.6) | 7 (15.6)  | -        | 2 (4.4)  | 22 (48.9) | 12 (26.7) | 5 (11.1)  | 3 (6.7)  | 3 (6.7)  |
| Sad                     | 32 (71.1) | 8 (17.8)  | 2 (4.4)   | 2 (4.4)  | 1 (2.2)  | 29 (64.4) | 6 (13.3)  | 5 (11.1)  | 4 (8.9)  | 1 (2.2)  |
| Annoyed                 | 27 (60.0) | 13 (28.9) | 4 (8.9)   | -        | 1 (2.2)  | 27 (60.0) | 10 (22.2) | 5 (11.1)  | -        | 3 (6.7)  |
| Tired                   | 9 (20.0)  | 15 (33.3) | 8 (17.8)  | 5 (11.1) | 8 (17.8) | 12 (26.7) | 13 (28.9) | 9 (20.0)  | 5 (11.1) | 6 (13.3) |
| Pain                    | 28 (62.2) | 6 (13.3)  | 6 (13.3)  | 3 (6.7)  | 2 (4.4)  | 21 (46.7) | 11 (24.4) | 4 (8.9)   | 2 (4.4)  | 7 (15.6) |
| Sleep                   | 21 (46.7) | 12 (26.7) | 5 (11.1)  | 3 (6.7)  | 4 (8.9)  | 20 (44.4) | 3 (6.7)   | 7 (15.6)  | 9 (20.0) | 6 (13.3) |
| Daily routine           | 23 (51.1) | 12 (26.7) | 4 (8.9)   | 3 (6.7)  | 3 (6.7)  | 19 (42.2) | 11 (24.4) | 7 (15.6)  | 4 (8.9)  | 4 (8.9)  |
| Work                    | 27 (60.0) | 15 (33.3) | 2 (4.4)   | 1 (2.2)  | -        | 23 (51.1) | 11 (24.4) | 7 (15.6)  | 1 (2.2)  | 3 (6.7)  |
| Able to join activities | 23 (51.1) | 6 (13.3)  | 10 (22.2) | 3 (6.7)  | 3 (6.7)  | 10 (22.2) | 14 (31.1) | 10 (22.2) | 9 (20.0) | 2 (4.4)  |

  

| CBT (n=51)              | Baseline  |           |          |         |           | 6 months  |           |          |          |          |
|-------------------------|-----------|-----------|----------|---------|-----------|-----------|-----------|----------|----------|----------|
|                         | Level 1   | Level 2   | Level 3  | Level 4 | Level 5   | Level 1   | Level 2   | Level 3  | Level 4  | Level 5  |
| Worried                 | 34 (66.7) | 8 (15.7)  | 3 (5.9)  | 2 (3.9) | 4 (7.8)   | 33 (64.7) | 6 (11.8)  | 7 (13.7) | 1 (2.0)  | 4 (7.8)  |
| Sad                     | 40 (78.4) | 5 (9.8)   | 2 (3.9)  | 1 (2.0) | 3 (5.9)   | 37 (72.5) | 5 (9.8)   | 5 (9.8)  | 1 (2.0)  | 3 (5.9)  |
| Annoyed                 | 37 (72.5) | 7 (13.7)  | 4 (7.8)  | 2 (3.9) | 1 (2.0)   | 34 (66.7) | 10 (19.6) | 5 (9.8)  | -        | 2 (3.9)  |
| Tired                   | 14 (27.5) | 19 (37.3) | 5 (9.8)  | 3 (5.9) | 10 (19.6) | 17 (33.3) | 19 (37.3) | 4 (7.8)  | 7 (13.7) | 4 (7.8)  |
| Pain                    | 33 (64.7) | 9 (17.6)  | 3 (5.9)  | 1 (2.0) | 5 (9.8)   | 28 (54.9) | 9 (17.6)  | 7 (13.7) | 3 (5.9)  | 4 (7.8)  |
| Sleep                   | 26 (51.0) | 10 (19.6) | 6 (11.8) | 3 (5.9) | 6 (11.8)  | 23 (45.1) | 8 (15.7)  | 8 (15.7) | 4 (7.8)  | 8 (15.7) |
| Daily routine           | 29 (56.9) | 8 (15.7)  | 4 (7.8)  | 4 (7.8) | 6 (11.8)  | 24 (47.1) | 15 (29.4) | 7 (13.7) | 3 (5.9)  | 2 (3.9)  |
| Work                    | 34 (66.7) | 7 (13.7)  | 6 (11.8) | 1 (2.0) | 3 (5.9)   | 33 (64.7) | 10 (19.6) | 5 (9.8)  | 3 (5.9)  | -        |
| Able to join activities | 30 (58.8) | 6 (11.8)  | 5 (9.8)  | 4 (7.8) | 6 (11.8)  | 24 (47.1) | 8 (15.7)  | 6 (11.8) | 8 (15.7) | 5 (9.8)  |

Note: Level 1: No, Level 2: A little bit, Level 3: A bit, Level 4: Quite a lot, Level 5 Very

## Appendix 7 Sensitivity analyses

| OST vs. CBT                                                                                          | Incremental costs<br>(£), (95% CI) | Incremental QALYs<br>(95% CI) | ICER (£/QALY<br>gained), (95% CI) | Probability of OST<br>being cost effective<br>at WTP threshold of<br>£20,000/QALYs |
|------------------------------------------------------------------------------------------------------|------------------------------------|-------------------------------|-----------------------------------|------------------------------------------------------------------------------------|
| Base-case                                                                                            | -302.96<br>(-28.61, -598.86)       | 0.002<br>(-0.004, 0.008)      | Dominant                          | 98%                                                                                |
| Scenario 1: Complete case analysis from<br>NHS/PSS perspective                                       | -31.10<br>(-154.21, 88.14)         | 0.001<br>(-0.002, 0.005)      | Dominant                          | 81%                                                                                |
| Scenario 2: CUA on CYP who received at<br>least one intervention session from<br>NHS/PSS perspective | -298.40<br>(-599.68, -23.90)       | 0.002<br>(-0.005, 0.009)      | Dominant                          | 99%                                                                                |
| Scenario 3: CUA (utility measured by<br>CHU9D)                                                       | -310.64<br>(-605.07, -44.10)       | 0.002<br>(-0.007, 0.012)      | Dominant                          | 98%                                                                                |
| Scenario 4: CUA (cost from societal<br>perspective)                                                  | -384.81<br>(-685.01, -107.16)      | 0.002<br>(-0.004, 0.008)      | Dominant                          | 99%                                                                                |
